# Supplementary material for: Temperature-dependent rate coefficients for the reaction of OH radicals with selected alkanes, aromatic compounds and monoterpenes
Source: Copernicus journal article supplement (doi:10.5194/egusphere-2024-2614), 2024-08-26
Supplement: Supplementary file 1 [file egusphere-2024-2614-supplement.pdf]

# Supplement to: Temperature-dependent rate coefficients for the reaction of OH radicals with selected alkanes, aromatic compounds and monoterpenes

Florian Berg<sup>1</sup>, Anna Novelli<sup>1</sup>, René Dubus<sup>1</sup>, Andreas Hofzumahaus<sup>1</sup>, Frank Holland<sup>1</sup>, Andreas Wahner<sup>1</sup>, and Hendrik Fuchs<sup>1,2</sup>

<sup>1</sup>Institute of Climate and Energy Systems, ICE-3: Troposphere, Forschungszentrum Jülich GmbH, Jülich, Germany

<sup>2</sup>Department of Physics, University of Cologne, Cologne, Germany

## S1 Data of reaction coefficient measurements

**Table S1.** OH reaction rates of methane measured in this study.

| canister A   |                                                              | canister B   |                                                              |
|--------------|--------------------------------------------------------------|--------------|--------------------------------------------------------------|
| <i>T</i> / K | <i>k</i> / 10 <sup>-14</sup> cm <sup>3</sup> s <sup>-1</sup> | <i>T</i> / K | <i>k</i> / 10 <sup>-14</sup> cm <sup>3</sup> s <sup>-1</sup> |
| 340.3 ± 0.6  | 1.40 ± 0.07                                                  | 340.7 ± 0.6  | 1.32 ± 0.06                                                  |
| 331.1 ± 0.5  | 1.12 ± 0.05                                                  | 331.4 ± 0.5  | 1.14 ± 0.05                                                  |
| 321.7 ± 0.5  | 0.99 ± 0.05                                                  | 322.0 ± 0.5  | 0.96 ± 0.04                                                  |
| 312.4 ± 0.4  | 0.83 ± 0.04                                                  | 312.5 ± 0.4  | 0.84 ± 0.04                                                  |
| 303.1 ± 0.4  | 0.73 ± 0.03                                                  | 303.2 ± 0.4  | 0.71 ± 0.03                                                  |
| 293.8 ± 0.5  | 0.62 ± 0.03                                                  | 293.8 ± 0.4  | 0.60 ± 0.03                                                  |
| 286.0 ± 0.6  | 0.50 ± 0.02                                                  | 284.4 ± 0.5  | 0.48 ± 0.03                                                  |

**Table S2.** OH reaction rates of ethane measured in this study.

| canister A      |                                      | canister B      |                                      | canister C      |                                      |
|-----------------|--------------------------------------|-----------------|--------------------------------------|-----------------|--------------------------------------|
| $T/K$           | $k/10^{-13}\text{cm}^3\text{s}^{-1}$ | $T/K$           | $k/10^{-13}\text{cm}^3\text{s}^{-1}$ | $T/K$           | $k/10^{-13}\text{cm}^3\text{s}^{-1}$ |
| $340.2 \pm 0.6$ | $3.85 \pm 0.14$                      | $340.4 \pm 0.5$ | $3.84 \pm 0.08$                      | $340.4 \pm 0.6$ | $3.73 \pm 0.07$                      |
| $331.0 \pm 0.5$ | $3.66 \pm 0.21$                      | $331.0 \pm 0.5$ | $3.44 \pm 0.11$                      | $331.2 \pm 0.5$ | $3.41 \pm 0.12$                      |
| $321.7 \pm 0.4$ | $3.22 \pm 0.15$                      | $321.7 \pm 0.4$ | $3.14 \pm 0.09$                      | $321.8 \pm 0.4$ | $3.21 \pm 0.12$                      |
| $312.4 \pm 0.4$ | $3.07 \pm 0.15$                      | $312.3 \pm 0.4$ | $2.85 \pm 0.13$                      | $312.4 \pm 0.4$ | $2.94 \pm 0.08$                      |
|                 |                                      | $303.0 \pm 0.4$ | $2.62 \pm 0.11$                      | $303.1 \pm 0.4$ | $2.65 \pm 0.06$                      |
|                 |                                      | $293.7 \pm 0.5$ | $2.31 \pm 0.06$                      | $293.7 \pm 0.4$ | $2.36 \pm 0.04$                      |
|                 |                                      | $284.4 \pm 0.6$ | $2.06 \pm 0.05$                      | $284.6 \pm 0.5$ | $2.09 \pm 0.06$                      |

**Table S3.** OH reaction rates of propane measured in this study. Propane was sampled from the same canister in all measurements.

| series A        |                                      | series B        |                                      | series C        |                                      |
|-----------------|--------------------------------------|-----------------|--------------------------------------|-----------------|--------------------------------------|
| $T/K$           | $k/10^{-12}\text{cm}^3\text{s}^{-1}$ | $T/K$           | $k/10^{-12}\text{cm}^3\text{s}^{-1}$ | $T/K$           | $k/10^{-12}\text{cm}^3\text{s}^{-1}$ |
| $340.4 \pm 0.7$ | $1.46 \pm 0.05$                      | $339.9 \pm 0.7$ | $1.45 \pm 0.04$                      | $340.2 \pm 0.6$ | $1.52 \pm 0.07$                      |
| $331.2 \pm 0.5$ | $1.35 \pm 0.04$                      | $321.4 \pm 0.4$ | $1.26 \pm 0.03$                      | $331.0 \pm 0.4$ | $1.39 \pm 0.07$                      |
|                 |                                      |                 |                                      | $321.7 \pm 0.4$ | $1.30 \pm 0.07$                      |
| $312.2 \pm 0.4$ | $1.19 \pm 0.03$                      |                 |                                      | $312.4 \pm 0.4$ | $1.22 \pm 0.06$                      |
|                 |                                      | $302.8 \pm 0.5$ | $1.12 \pm 0.03$                      | $303.1 \pm 0.4$ | $1.16 \pm 0.06$                      |
|                 |                                      |                 |                                      | $293.7 \pm 0.5$ | $1.08 \pm 0.06$                      |
|                 |                                      |                 |                                      | $284.8 \pm 0.5$ | $1.01 \pm 0.06$                      |
| series D        |                                      | series E        |                                      |                 |                                      |
| $T/K$           | $k/10^{-12}\text{cm}^3\text{s}^{-1}$ | $T/K$           | $k/10^{-12}\text{cm}^3\text{s}^{-1}$ |                 |                                      |
| $340.4 \pm 0.6$ | $1.45 \pm 0.03$                      | $340.4 \pm 0.6$ | $1.47 \pm 0.05$                      |                 |                                      |
| $321.8 \pm 0.4$ | $1.29 \pm 0.04$                      | $321.7 \pm 0.4$ | $1.33 \pm 0.05$                      |                 |                                      |
| $303.0 \pm 0.4$ | $1.16 \pm 0.04$                      | $303.0 \pm 0.4$ | $1.17 \pm 0.03$                      |                 |                                      |
| $284.7 \pm 0.6$ | $0.99 \pm 0.04$                      | $284.4 \pm 0.6$ | $0.98 \pm 0.04$                      |                 |                                      |

**Table S4.** OH reaction rates of n-butane measured in this study.

| canister A      |                                      | canister B      |                                      | canister C      |                                      |
|-----------------|--------------------------------------|-----------------|--------------------------------------|-----------------|--------------------------------------|
| $T/K$           | $k/10^{-12}\text{cm}^3\text{s}^{-1}$ | $T/K$           | $k/10^{-12}\text{cm}^3\text{s}^{-1}$ | $T/K$           | $k/10^{-12}\text{cm}^3\text{s}^{-1}$ |
| $340.1 \pm 0.7$ | $2.82 \pm 0.11$                      | $340.3 \pm 0.6$ | $2.98 \pm 0.08$                      | $340.5 \pm 0.6$ | $3.17 \pm 0.08$                      |
| $331.1 \pm 0.6$ | $2.84 \pm 0.07$                      | $331.2 \pm 0.5$ | $2.88 \pm 0.08$                      | $331.3 \pm 0.4$ | $2.98 \pm 0.12$                      |
| $321.9 \pm 0.5$ | $2.71 \pm 0.06$                      | $321.8 \pm 0.4$ | $2.80 \pm 0.06$                      | $322.0 \pm 0.4$ | $3.08 \pm 0.14$                      |
| $312.5 \pm 0.4$ | $2.60 \pm 0.07$                      | $312.5 \pm 0.4$ | $2.67 \pm 0.07$                      | $312.6 \pm 0.4$ | $2.78 \pm 0.11$                      |
| $303.1 \pm 0.4$ | $2.55 \pm 0.05$                      | $303.1 \pm 0.4$ | $2.60 \pm 0.05$                      | $303.2 \pm 0.4$ | $2.58 \pm 0.09$                      |
| $293.9 \pm 0.5$ | $2.43 \pm 0.04$                      | $293.7 \pm 0.5$ | $2.52 \pm 0.06$                      | $293.8 \pm 0.4$ | $2.56 \pm 0.14$                      |
| $285.3 \pm 0.6$ | $2.29 \pm 0.05$                      | $284.5 \pm 0.5$ | $2.33 \pm 0.06$                      |                 |                                      |

**Table S5.** OH reaction rates of methyl vinyl ketone (MVK) measured in this study.

| canister A      |                                      | canister B      |                                      | canister C      |                                      |
|-----------------|--------------------------------------|-----------------|--------------------------------------|-----------------|--------------------------------------|
| $T/K$           | $k/10^{-11}\text{cm}^3\text{s}^{-1}$ | $T/K$           | $k/10^{-11}\text{cm}^3\text{s}^{-1}$ | $T/K$           | $k/10^{-11}\text{cm}^3\text{s}^{-1}$ |
| $340.6 \pm 0.5$ | $1.51 \pm 0.03$                      | $340.4 \pm 0.5$ | $1.58 \pm 0.04$                      | $340.5 \pm 0.5$ | $1.53 \pm 0.04$                      |
| $331.3 \pm 0.5$ | $1.62 \pm 0.04$                      | $331.3 \pm 0.5$ | $1.69 \pm 0.04$                      | $331.3 \pm 0.5$ | $1.67 \pm 0.05$                      |
| $321.9 \pm 0.4$ | $1.72 \pm 0.05$                      | $321.8 \pm 0.4$ | $1.80 \pm 0.04$                      | $321.9 \pm 0.4$ | $1.78 \pm 0.04$                      |
| $312.5 \pm 0.4$ | $1.84 \pm 0.05$                      | $312.5 \pm 0.4$ | $1.93 \pm 0.05$                      | $312.5 \pm 0.4$ | $1.91 \pm 0.06$                      |
| $303.1 \pm 0.4$ | $1.99 \pm 0.04$                      | $303.1 \pm 0.4$ | $2.05 \pm 0.05$                      | $303.1 \pm 0.4$ | $1.98 \pm 0.04$                      |
| $293.8 \pm 0.5$ | $2.15 \pm 0.05$                      | $293.8 \pm 0.4$ | $2.26 \pm 0.06$                      | $293.8 \pm 0.5$ | $2.21 \pm 0.05$                      |
| $285.2 \pm 0.5$ | $2.21 \pm 0.11$                      | $284.5 \pm 0.5$ | $2.35 \pm 0.06$                      | $284.7 \pm 0.5$ | $2.42 \pm 0.06$                      |

**Table S6.** OH reaction rates of myrcene measured in this study.

| canister A      |                                      | canister B      |                                      | canister C      |                                      |
|-----------------|--------------------------------------|-----------------|--------------------------------------|-----------------|--------------------------------------|
| $T/K$           | $k/10^{-10}\text{cm}^3\text{s}^{-1}$ | $T/K$           | $k/10^{-10}\text{cm}^3\text{s}^{-1}$ | $T/K$           | $k/10^{-10}\text{cm}^3\text{s}^{-1}$ |
| $340.5 \pm 0.6$ | $1.14 \pm 0.04$                      | $340.6 \pm 0.5$ | $1.20 \pm 0.02$                      | $340.7 \pm 0.5$ | $1.17 \pm 0.03$                      |
| $331.3 \pm 0.4$ | $1.25 \pm 0.03$                      | $331.3 \pm 0.4$ | $1.32 \pm 0.03$                      | $331.4 \pm 0.4$ | $1.33 \pm 0.04$                      |
| $321.9 \pm 0.4$ | $1.40 \pm 0.03$                      | $322.0 \pm 0.4$ | $1.46 \pm 0.07$                      | $322.1 \pm 0.4$ | $1.42 \pm 0.06$                      |
| $312.6 \pm 0.4$ | $1.53 \pm 0.04$                      | $312.6 \pm 0.4$ | $1.57 \pm 0.04$                      | $312.8 \pm 0.4$ | $1.51 \pm 0.05$                      |
| $303.1 \pm 0.4$ | $1.64 \pm 0.04$                      | $303.3 \pm 0.4$ | $1.62 \pm 0.05$                      | $303.3 \pm 0.4$ | $1.68 \pm 0.07$                      |
| $293.8 \pm 0.5$ | $1.77 \pm 0.03$                      | $293.9 \pm 0.5$ | $1.76 \pm 0.06$                      | $293.9 \pm 0.5$ | $1.73 \pm 0.04$                      |
| $284.5 \pm 0.6$ | $1.99 \pm 0.06$                      | $284.8 \pm 0.5$ | $1.92 \pm 0.07$                      | $285.4 \pm 0.5$ | $1.88 \pm 0.07$                      |

**Table S7.** OH reaction rates of  $\Delta^3$ -carene measured in this study.

| canister A      |                                      | canister B      |                                      | canister C      |                                      |
|-----------------|--------------------------------------|-----------------|--------------------------------------|-----------------|--------------------------------------|
| $T/K$           | $k/10^{-11}\text{cm}^3\text{s}^{-1}$ | $T/K$           | $k/10^{-11}\text{cm}^3\text{s}^{-1}$ | $T/K$           | $k/10^{-11}\text{cm}^3\text{s}^{-1}$ |
| $340.8 \pm 0.6$ | $7.3 \pm 0.3$                        | $340.6 \pm 0.5$ | $7.53 \pm 0.17$                      | $340.6 \pm 0.6$ | $7.65 \pm 0.13$                      |
| $331.4 \pm 0.5$ | $7.25 \pm 0.14$                      | $331.2 \pm 0.5$ | $7.33 \pm 0.13$                      | $331.3 \pm 0.5$ | $7.54 \pm 0.17$                      |
| $322.0 \pm 0.4$ | $7.43 \pm 0.17$                      | $321.9 \pm 0.4$ | $7.76 \pm 0.15$                      | $321.9 \pm 0.4$ | $7.6 \pm 0.3$                        |
| $312.6 \pm 0.4$ | $7.55 \pm 0.14$                      | $312.5 \pm 0.4$ | $8.02 \pm 0.16$                      | $312.5 \pm 0.4$ | $8.1 \pm 0.3$                        |
| $303.3 \pm 0.4$ | $7.79 \pm 0.15$                      | $303.1 \pm 0.4$ | $8.29 \pm 0.17$                      | $303.2 \pm 0.4$ | $8.2 \pm 0.2$                        |
| $293.9 \pm 0.4$ | $8.29 \pm 0.16$                      | $293.9 \pm 0.4$ | $8.7 \pm 0.3$                        | $293.8 \pm 0.4$ | $8.69 \pm 0.16$                      |
| $284.5 \pm 0.5$ | $8.5 \pm 0.3$                        | $284.4 \pm 0.5$ | $9.3 \pm 0.3$                        | $284.5 \pm 0.5$ | $9.0 \pm 0.6$                        |

**Table S8.** OH reaction rates of  $\gamma$ -terpinene measured in this study.

| canister A      |                                      | canister B      |                                      | canister C      |                                      |
|-----------------|--------------------------------------|-----------------|--------------------------------------|-----------------|--------------------------------------|
| $T/K$           | $k/10^{-10}\text{cm}^3\text{s}^{-1}$ | $T/K$           | $k/10^{-10}\text{cm}^3\text{s}^{-1}$ | $T/K$           | $k/10^{-10}\text{cm}^3\text{s}^{-1}$ |
| $340.5 \pm 0.5$ | $1.06 \pm 0.02$                      | $340.5 \pm 0.5$ | $1.06 \pm 0.03$                      | $340.4 \pm 0.5$ | $1.10 \pm 0.03$                      |
| $331.2 \pm 0.4$ | $1.21 \pm 0.03$                      | $331.1 \pm 0.4$ | $1.22 \pm 0.03$                      | $331.2 \pm 0.5$ | $1.25 \pm 0.03$                      |
| $321.9 \pm 0.4$ | $1.34 \pm 0.04$                      | $321.8 \pm 0.4$ | $1.29 \pm 0.04$                      | $321.9 \pm 0.4$ | $1.36 \pm 0.03$                      |
| $312.5 \pm 0.4$ | $1.42 \pm 0.03$                      | $312.5 \pm 0.4$ | $1.45 \pm 0.03$                      | $312.4 \pm 0.4$ | $1.48 \pm 0.05$                      |
| $303.1 \pm 0.4$ | $1.61 \pm 0.03$                      | $303.1 \pm 0.4$ | $1.51 \pm 0.03$                      | $303.1 \pm 0.4$ | $1.56 \pm 0.04$                      |
| $293.9 \pm 0.4$ | $1.68 \pm 0.03$                      | $293.7 \pm 0.5$ | $1.65 \pm 0.03$                      | $293.8 \pm 0.4$ | $1.67 \pm 0.04$                      |
| $284.6 \pm 0.5$ | $1.77 \pm 0.05$                      | $284.5 \pm 0.5$ | $1.97 \pm 0.05$                      | $284.5 \pm 0.5$ | $1.86 \pm 0.05$                      |

**Table S9.** OH reaction rates of toluene measured in this study.

| canister A      |                                      | canister B      |                                      | canister C      |                                      |
|-----------------|--------------------------------------|-----------------|--------------------------------------|-----------------|--------------------------------------|
| $T/K$           | $k/10^{-12}\text{cm}^3\text{s}^{-1}$ | $T/K$           | $k/10^{-12}\text{cm}^3\text{s}^{-1}$ | $T/K$           | $k/10^{-12}\text{cm}^3\text{s}^{-1}$ |
| $340.5 \pm 0.5$ | $4.73 \pm 0.11$                      | $340.4 \pm 0.5$ | $4.62 \pm 0.15$                      | $340.5 \pm 0.5$ | $4.77 \pm 0.11$                      |
| $331.1 \pm 0.5$ | $5.13 \pm 0.13$                      | $331.2 \pm 0.5$ | $5.03 \pm 0.10$                      | $331.2 \pm 0.5$ | $5.12 \pm 0.16$                      |
| $321.8 \pm 0.4$ | $5.36 \pm 0.12$                      | $321.8 \pm 0.4$ | $5.54 \pm 0.18$                      | $321.9 \pm 0.4$ | $5.44 \pm 0.14$                      |
| $312.4 \pm 0.4$ | $5.58 \pm 0.15$                      | $312.5 \pm 0.4$ | $5.77 \pm 0.20$                      | $312.6 \pm 0.4$ | $5.63 \pm 0.24$                      |
| $303.2 \pm 0.4$ | $5.77 \pm 0.09$                      | $303.2 \pm 0.4$ | $6.09 \pm 0.18$                      | $303.2 \pm 0.4$ | $5.87 \pm 0.14$                      |
| $293.9 \pm 0.4$ | $6.01 \pm 0.11$                      | $293.8 \pm 0.4$ | $6.11 \pm 0.31$                      | $293.8 \pm 0.4$ | $6.01 \pm 0.14$                      |
| $284.5 \pm 0.5$ | $6.14 \pm 0.11$                      | $284.5 \pm 0.5$ | $6.08 \pm 0.23$                      | $285.5 \pm 0.5$ | $5.90 \pm 0.18$                      |

**Table S10.** OH reaction rates of mesitylene measured in this study.

| canister A      |                                      | canister B      |                                      | canister C      |                                      |
|-----------------|--------------------------------------|-----------------|--------------------------------------|-----------------|--------------------------------------|
| $T/K$           | $k/10^{-11}\text{cm}^3\text{s}^{-1}$ | $T/K$           | $k/10^{-11}\text{cm}^3\text{s}^{-1}$ | $T/K$           | $k/10^{-11}\text{cm}^3\text{s}^{-1}$ |
| $340.6 \pm 0.5$ | $3.99 \pm 0.08$                      | $340.5 \pm 0.5$ | $4.03 \pm 0.08$                      | $340.5 \pm 0.6$ | $4.06 \pm 0.12$                      |
| $331.1 \pm 0.4$ | $4.35 \pm 0.09$                      | $331.2 \pm 0.4$ | $4.48 \pm 0.09$                      | $331.3 \pm 0.4$ | $4.56 \pm 0.09$                      |
| $321.8 \pm 0.4$ | $4.92 \pm 0.13$                      | $321.8 \pm 0.4$ | $4.85 \pm 0.10$                      | $321.9 \pm 0.4$ | $4.98 \pm 0.11$                      |
| $312.5 \pm 0.4$ | $5.25 \pm 0.11$                      | $312.4 \pm 0.4$ | $5.28 \pm 0.12$                      | $312.5 \pm 0.4$ | $5.37 \pm 0.13$                      |
| $303.1 \pm 0.4$ | $5.57 \pm 0.17$                      | $303.2 \pm 0.4$ | $5.69 \pm 0.10$                      | $303.1 \pm 0.4$ | $5.77 \pm 0.10$                      |
| $293.8 \pm 0.4$ | $6.41 \pm 0.16$                      | $293.9 \pm 0.4$ | $6.17 \pm 0.15$                      | $293.8 \pm 0.4$ | $6.27 \pm 0.14$                      |
| $284.5 \pm 0.5$ | $6.64 \pm 0.12$                      | $284.6 \pm 0.5$ | $6.63 \pm 0.13$                      | $284.6 \pm 0.5$ | $6.65 \pm 0.17$                      |

**Table S11.** OH reaction rates of m-xylene measured in this study.

| canister A      |                                      | canister B      |                                      | canister C      |                                      |
|-----------------|--------------------------------------|-----------------|--------------------------------------|-----------------|--------------------------------------|
| $T/K$           | $k/10^{-11}\text{cm}^3\text{s}^{-1}$ | $T/K$           | $k/10^{-11}\text{cm}^3\text{s}^{-1}$ | $T/K$           | $k/10^{-11}\text{cm}^3\text{s}^{-1}$ |
| $340.5 \pm 0.5$ | $1.66 \pm 0.04$                      | $340.4 \pm 0.5$ | $1.72 \pm 0.06$                      | $340.6 \pm 0.5$ | $1.70 \pm 0.06$                      |
| $331.2 \pm 0.5$ | $1.80 \pm 0.05$                      | $331.3 \pm 0.4$ | $1.92 \pm 0.05$                      | $331.5 \pm 0.4$ | $1.94 \pm 0.06$                      |
| $321.8 \pm 0.4$ | $2.01 \pm 0.05$                      | $321.9 \pm 0.4$ | $2.05 \pm 0.05$                      | $322.2 \pm 0.4$ | $2.03 \pm 0.08$                      |
| $312.5 \pm 0.4$ | $2.16 \pm 0.06$                      | $312.5 \pm 0.4$ | $2.22 \pm 0.05$                      | $312.8 \pm 0.4$ | $2.22 \pm 0.09$                      |
| $303.1 \pm 0.4$ | $2.41 \pm 0.06$                      | $303.2 \pm 0.4$ | $2.37 \pm 0.06$                      | $303.2 \pm 0.4$ | $2.30 \pm 0.06$                      |
| $293.9 \pm 0.5$ | $2.62 \pm 0.07$                      | $293.9 \pm 0.4$ | $2.60 \pm 0.04$                      | $294.1 \pm 0.4$ | $2.56 \pm 0.07$                      |
| $285.0 \pm 0.5$ | $2.79 \pm 0.11$                      | $285.0 \pm 0.6$ | $2.72 \pm 0.07$                      |                 |                                      |

**Table S12.** OH reaction rates of o-xylene measured in this study.

| canister A      |                                      | canister B      |                                      | canister C      |                                      |
|-----------------|--------------------------------------|-----------------|--------------------------------------|-----------------|--------------------------------------|
| $T/K$           | $k/10^{-11}\text{cm}^3\text{s}^{-1}$ | $T/K$           | $k/10^{-11}\text{cm}^3\text{s}^{-1}$ | $T/K$           | $k/10^{-11}\text{cm}^3\text{s}^{-1}$ |
| $340.5 \pm 0.5$ | $1.05 \pm 0.03$                      | $340.6 \pm 0.6$ | $1.06 \pm 0.03$                      | $340.6 \pm 0.6$ | $1.03 \pm 0.03$                      |
| $331.3 \pm 0.4$ | $1.13 \pm 0.04$                      | $331.3 \pm 0.5$ | $1.13 \pm 0.03$                      |                 |                                      |
| $321.9 \pm 0.4$ | $1.22 \pm 0.04$                      | $321.9 \pm 0.4$ | $1.22 \pm 0.03$                      | $322.1 \pm 0.4$ | $1.16 \pm 0.03$                      |
| $312.5 \pm 0.4$ | $1.28 \pm 0.03$                      | $312.6 \pm 0.4$ | $1.28 \pm 0.04$                      | $312.7 \pm 0.4$ | $1.29 \pm 0.04$                      |
| $303.1 \pm 0.4$ | $1.34 \pm 0.03$                      | $303.2 \pm 0.4$ | $1.34 \pm 0.03$                      | $303.4 \pm 0.4$ | $1.31 \pm 0.04$                      |
| $293.8 \pm 0.4$ | $1.43 \pm 0.03$                      | $293.9 \pm 0.4$ | $1.43 \pm 0.03$                      | $294.0 \pm 0.5$ | $1.40 \pm 0.04$                      |
| $285.1 \pm 0.5$ | $1.44 \pm 0.05$                      | $285.6 \pm 0.5$ | $1.43 \pm 0.05$                      | $286.2 \pm 0.5$ | $1.41 \pm 0.06$                      |
